# Supplementary material
Source: HighWire-hosted journal article supplement (https://erj.ersjournals.com/content/59/6/2102406)

# Figure 2S

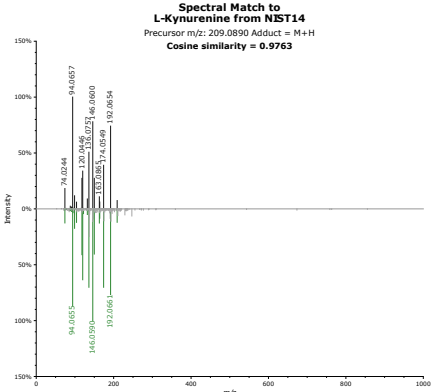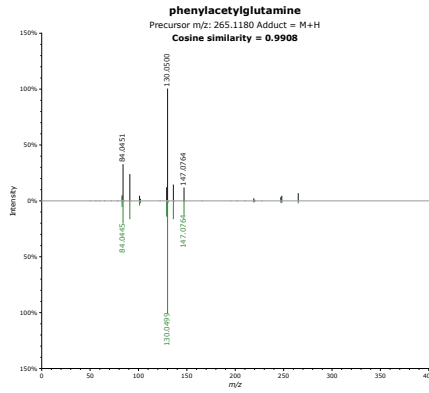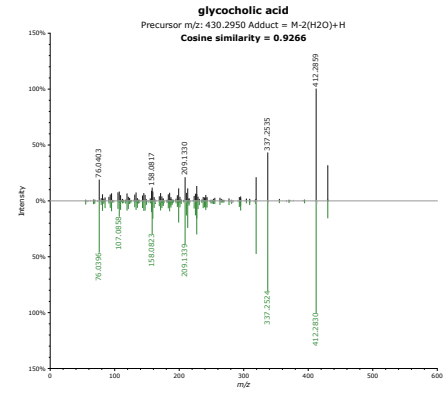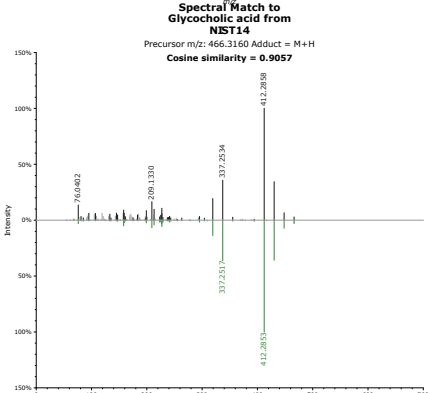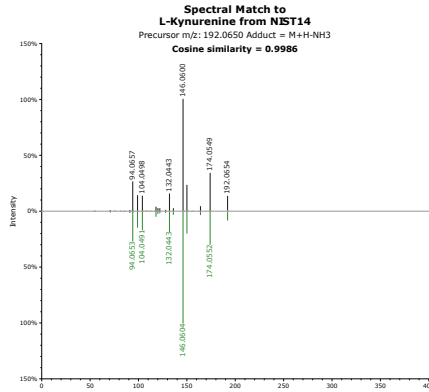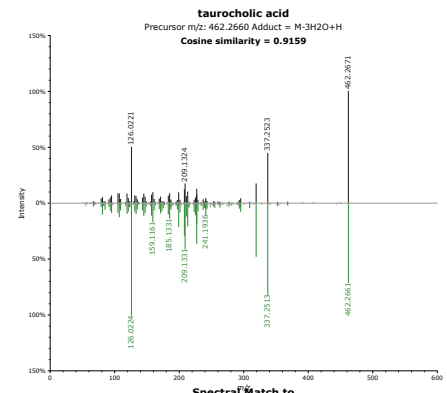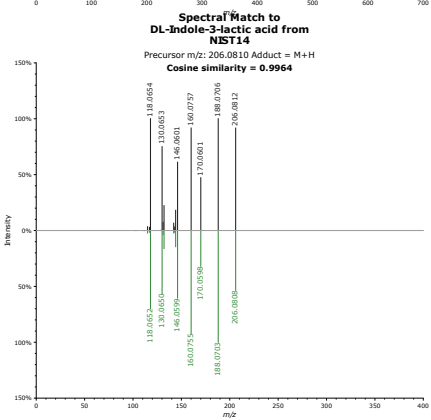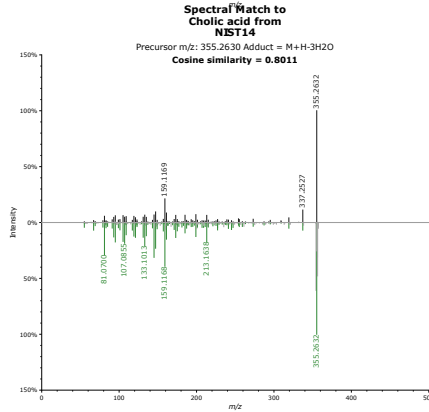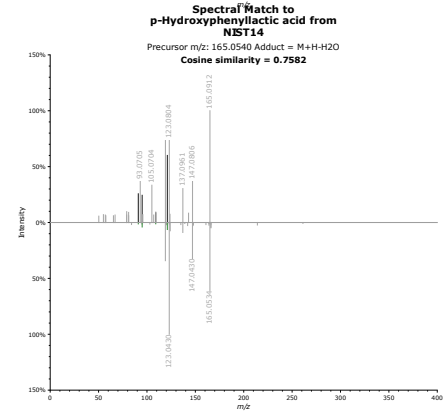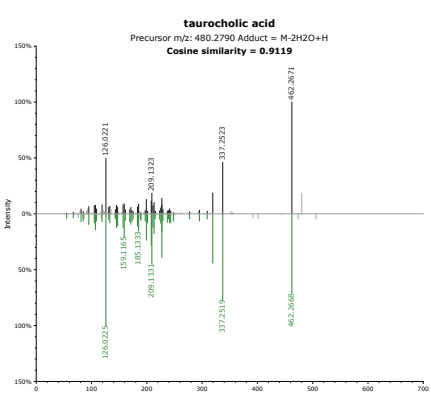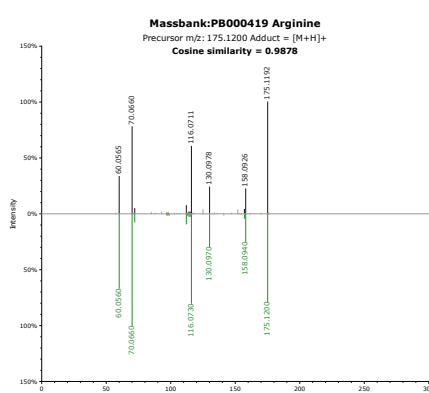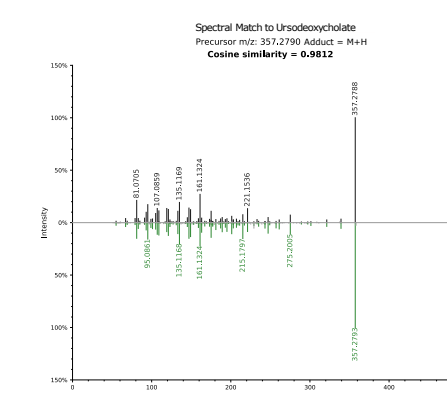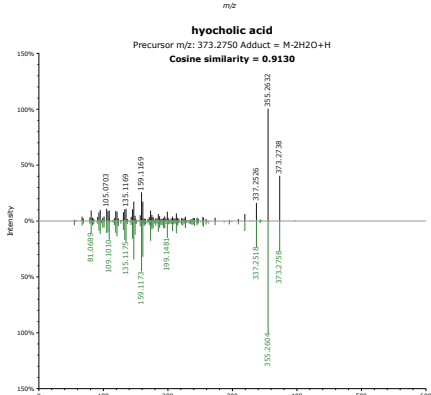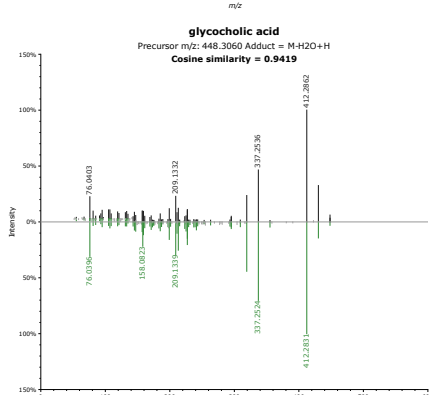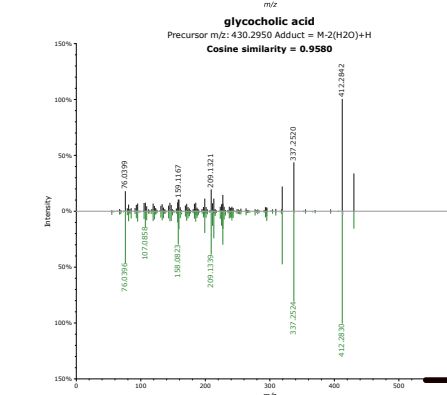

Supplement: inline-supplementary-material-3 [file inline-supplementary-material-3.pdf]
